# Supplementary material for: Evolutionary relevance of single nucleotide variants within the forebrain exclusive human accelerated enhancer regions
Source: Springer Nature journal article supplement (doi:10.1186/s12860-023-00474-5), 2023-03-29
Supplement: 12860_2023_474_MOESM1_ESM.pdf [file 12860_2023_474_MOESM1_ESM.pdf]

## Supplementary Figure S1

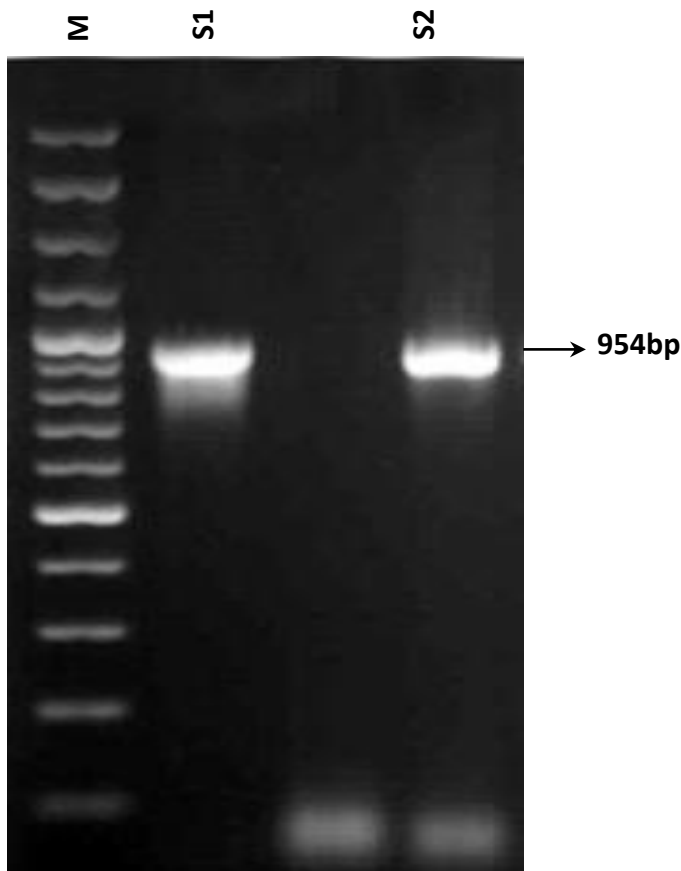

### Electropherogram of PCR products of SOX2

1% agarose gel stained by ethidium bromide shows PCR products of SOX2. M represents Molecular Marker (100 bp) and S represents samples
