# Supplementary material for: Evolutionary relevance of single nucleotide variants within the forebrain exclusive human accelerated enhancer regions
Source: Springer Nature journal article supplement (doi:10.1186/s12860-023-00474-5), 2023-03-29
Supplement: 12860_2023_474_MOESM2_ESM.pdf [file 12860_2023_474_MOESM2_ESM.pdf]

## Supplementary Figure S2

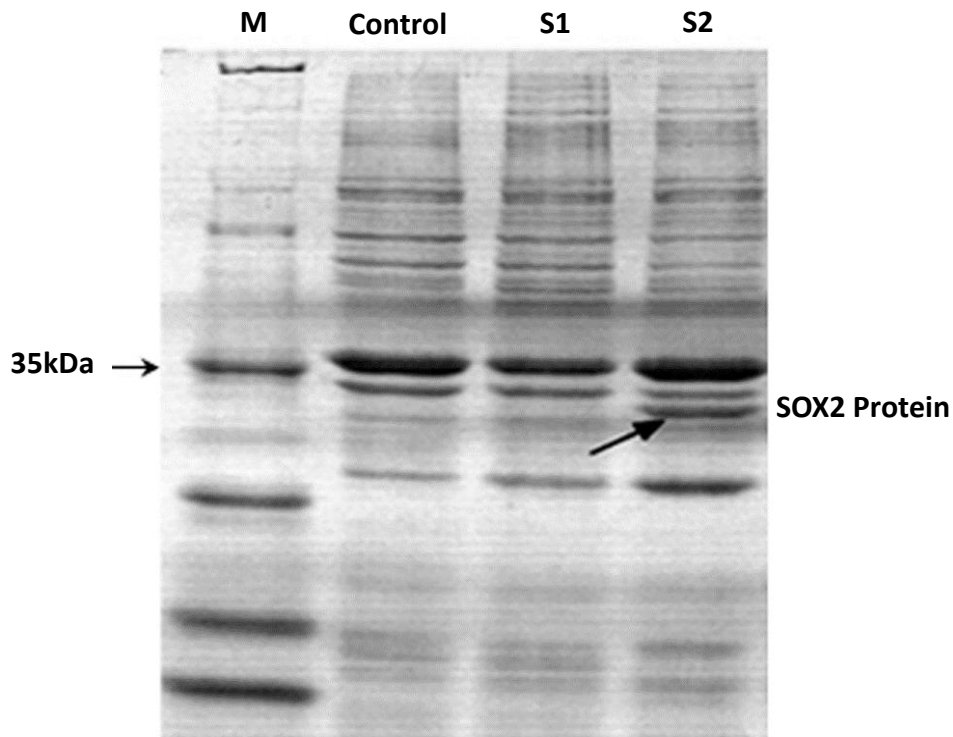

**Expression of SOX2 protein** SDS-PAGE of SOX2 protein. M: protein marker 10-245 KDa; control: BI21 cells; S: samples
