# Supplementary material for: Evolutionary relevance of single nucleotide variants within the forebrain exclusive human accelerated enhancer regions
Source: Springer Nature journal article supplement (doi:10.1186/s12860-023-00474-5), 2023-03-29
Supplement: 12860_2023_474_MOESM3_ESM.pdf [file 12860_2023_474_MOESM3_ESM.pdf]

# Supplementary Figure S3

Modern Human (MH)  
Archaic Hominin (AH)  
MH+SOX2  
AH+SOX2  
MH+SOX2+Ab  
AH+SOX2+Ab

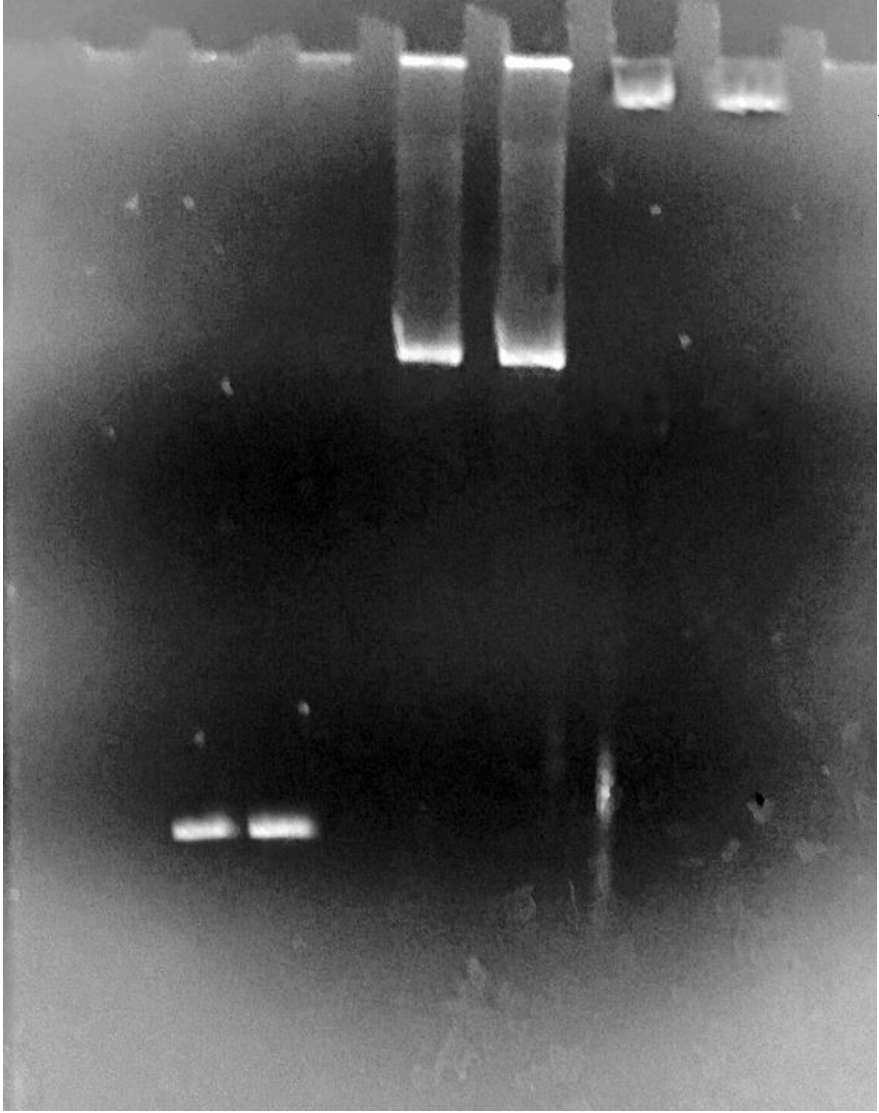

← Super shifted bands

← Shifted bands

← Free probs

## Full-size image of EMSA/Gel shift assay

Electrophoretic mobility shift assay shows shift in the mobility of SOX2 protein-DNA complexes as compared to the free probes Modern Human (MH) and Archaic Hominin (AH). Ab indicates Antibody. This image is full-size, uncropped version of Figure 1C.
